# Supplementary material
Source: publisher figshare collection journal article supplement (https://acs.figshare.com/ndownloader/files/15054440)
Supplement: Supplementary file 1 [file 15054440]

## Sheet: Cover
	Nanoparticle Concentration vs. Surface area in the interaction of Thiol Containing Molecules: Towards a Rational Nano-architectural Design of Hybrid-materials
	Keshav Goel,a,b Caitlin Lazurko,a,b Erik Jacques,a,b Matias Zuñiga-Bustos,c Francisco Valenzuela-Henriquez,d Natalia L. Pacioni,e,f Jean-Francois Couture,f g Horacio Poblete,c,gh,h i and Emilio I. Alarcona
	This file contains the formula calculations to determine total surface area averaged (TSAA)
	A tutorial on how to use spreadsheet is found in the electronical supplementary information (ESI) file of our paper
	TSAA algorithm in next page ---------->

## Sheet: Algorithm 
This spreadsheet was established using the volume of a sphere. For other shapes please exchange V(di) calculation
*All values must be expressed in nanometers (nm)
		Experimental Data		TSSA-NANoPoLC
		Presence percentage (pi)	Diameter (di; nm)	g(di)	V (di)	V atom	F(di)	hi	S(di)	A(di)	Finite sum=	S(di)=	0
		0	0	0	0	0.00909699	0	0	0	0
		0	0	0	0	0.00909699	0	0	0	0	Initial concentration=	S0=	0	M
		0	0	0	0	0.00909699	0	0	0	0
		0	0	0	0	0.00909699	0	0	0	0	Nanoparticle concentration=	[NP]=	#DIV/0!	M
		0	0	0	0	0.00909699	0	0	0	0
		0	0	0	0	0.00909699	0	0	0	0	Total Surface Area	[A]=	#DIV/0!	Use CNTRl+SHIFT+Enter after clicking on formula
		0	0	0	0	0.00909699	0	0	0	0
		0	0	0	0	0.00909699	0	0	0	0	Volume of Solution (L)	V=	0
		0	0	0	0	0.00909699	0	0	0	0
		0	0	0	0	0.00909699	0	0	0	0	Total Surface Area (Unit Conversion Included) nm^2	[Af]=	#DIV/0!
		0	0	0	0	0.00909699	0	0	0	0
		0	0	0	0	0.00909699	0	0	0	0
		0	0	0	0	0.00909699	0	0	0	0
		0	0	0	0	0.00909699	0	0	0	0
		0	0	0	0	0.00909699	0	0	0	0
		0	0	0	0	0.00909699	0	0	0	0
		0	0	0	0	0.00909699	0	0	0	0
		0	0	0	0	0.00909699	0	0	0	0
		0	0	0	0	0.00909699	0	0	0	0
		0	0	0	0	0.00909699	0	0	0	0
		0	0	0	0	0.00909699	0	0	0	0
		0	0	0	0	0.00909699	0	0	0	0
		0	0	0	0	0.00909699	0	0	0	0
		0	0	0	0	0.00909699	0	0	0	0
		0	0	0	0	0.00909699	0	0	0	0
		0	0	0	0	0.00909699	0	0	0	0
		0	0	0	0	0.00909699	0	0	0	0
		0	0	0	0	0.00909699	0	0	0	0
		0	0	0	0	0.00909699	0	0	0	0
		0	0	0	0	0.00909699	0	0	0	0
		0	0	0	0	0.00909699	0	0	0	0
		0	0	0	0	0.00909699	0	0	0	0
		0	0	0	0	0.00909699	0	0	0	0
		0	0	0	0	0.00909699	0	0	0	0
		0	0	0	0	0.00909699	0	0	0	0
		0	0	0	0	0.00909699	0	0		0
		0	0	0	0	0.00909699	0	0		0
		0	0	0	0	0.00909699	0	0		0
		0	0	0	0	0.00909699	0	0		0
		0	0	0	0	0.00909699	0	0		0
		0	0	0	0	0.00909699	0	0		0
		0	0	0	0	0.00909699	0	0		0
		0	0	0	0	0.00909699	0	0		0
		0	0	0	0	0.00909699	0	0		0
		0	0	0	0	0.00909699	0	0		0
		0	0	0	0	0.00909699	0	0		0
		0	0	0	0	0.00909699	0	0		0
		0	0	0	0	0.00909699	0	0		0
		0	0	0	0	0.00909699	0	0		0
		0	0	0	0	0.00909699	0	0		0
		0	0	0	0	0.00909699	0	0		0
		0	0	0	0	0.00909699	0	0		0
		0	0	0	0	0.00909699	0	0		0
		0	0	0	0	0.00909699	0	0		0
		0	0	0	0	0.00909699	0	0		0
		0	0	0	0	0.00909699	0	0		0
		0	0	0	0	0.00909699	0	0		0
		0	0	0	0	0.00909699	0	0		0
		0	0	0	0	0.00909699	0	0		0
		0	0	0	0	0.00909699	0	0		0
		0	0	0	0	0.00909699	0	0		0
		0	0	0	0	0.00909699	0	0		0
		0	0	0	0	0.00909699	0	0		0
		0	0	0	0	0.00909699	0	0		0
		0	0	0	0	0.00909699	0	0		0
		0	0	0	0	0.00909699	0	0		0
		0	0	0	0	0.00909699	0	0		0
		0	0	0	0	0.00909699	0	0		0
		0	0	0	0	0.00909699	0	0		0
		0	0	0	0	0.00909699	0	0		0
		0	0	0	0	0.00909699	0	0		0
		0	0	0	0	0.00909699	0	0		0
		0	0	0	0	0.00909699	0	0		0
		0	0	0	0	0.00909699	0	0		0
		0	0	0	0	0.00909699	0	0		0
		0	0	0	0	0.00909699	0	0		0
		0	0	0	0	0.00909699	0	0		0
		0	0	0	0	0.00909699	0	0		0
		0	0	0	0	0.00909699	0	0		0
		0	0	0	0	0.00909699	0	0		0
		0	0	0	0	0.00909699	0	0		0
		0	0	0	0	0.00909699	0	0		0
		0	0	0	0	0.00909699	0	0		0
		0	0	0	0	0.00909699	0	0		0
		0	0	0	0	0.00909699	0	0		0
		0	0	0	0	0.00909699	0	0		0
		0	0	0	0	0.00909699	0	0		0
		0	0	0	0	0.00909699	0	0		0
		0	0	0	0	0.00909699	0	0		0
		0	0	0	0	0.00909699	0	0		0
		0	0	0	0	0.00909699	0	0		0
		0	0	0	0	0.00909699	0	0		0
		0	0	0	0	0.00909699	0	0		0
		0	0	0	0	0.00909699	0	0		0
		0	0	0	0	0.00909699	0	0		0
		0	0	0	0	0.00909699	0	0		0
		0	0	0	0	0.00909699	0	0		0
		0	0	0	0	0.00909699	0	0		0
		0	0	0	0	0.00909699	0	0		0
		0	0	0	0	0.00909699	0	0		0
		0	0	0	0	0.00909699	0	0		0
		0	0	0	0	0.00909699	0	0		0
		0	0	0	0	0.00909699	0	0		0
		0	0	0	0	0.00909699	0	0		0
		0	0	0	0	0.00909699	0	0		0
		0	0	0	0	0.00909699	0	0		0
		0	0	0	0	0.00909699	0	0		0
		0	0	0	0	0.00909699	0	0		0
		0	0	0	0	0.00909699	0	0		0
		0	0	0	0	0.00909699	0	0		0
		0	0	0	0	0.00909699	0	0		0
		0	0	0	0	0.00909699	0	0		0
		0	0	0	0	0.00909699	0	0		0
		0	0	0	0	0.00909699	0	0		0
		0	0	0	0	0.00909699	0	0		0
		0	0	0	0	0.00909699	0	0		0
		0	0	0	0	0.00909699	0	0		0
		0	0	0	0	0.00909699	0	0		0
		0	0	0	0	0.00909699	0	0		0
		0	0	0	0	0.00909699	0	0		0
		0	0	0	0	0.00909699	0	0		0
		0	0	0	0	0.00909699	0	0		0
		0	0	0	0	0.00909699	0	0		0
		0	0	0	0	0.00909699	0	0		0
		0	0	0	0	0.00909699	0	0		0
		0	0	0	0	0.00909699	0	0		0
		0	0	0	0	0.00909699	0	0		0
		0	0	0	0	0.00909699	0	0		0
		0	0	0	0	0.00909699	0	0		0
		0	0	0	0	0.00909699	0	0		0
		0	0	0	0	0.00909699	0	0		0
		0	0	0	0	0.00909699	0	0		0
		0	0	0	0	0.00909699	0	0		0
		0	0	0	0	0.00909699	0	0		0
		0	0	0	0	0.00909699	0	0		0
		0	0	0	0	0.00909699	0	0		0
		0	0	0	0	0.00909699	0	0		0
		0	0	0	0	0.00909699	0	0		0
		0	0	0	0	0.00909699	0	0		0
		0	0	0	0	0.00909699	0	0		0
		0	0	0	0	0.00909699	0	0		0
		0	0	0	0	0.00909699	0	0		0
		0	0	0	0	0.00909699	0	0		0
		0	0	0	0	0.00909699	0	0		0
		0	0	0	0	0.00909699	0	0		0
		0	0	0	0	0.00909699	0	0		0
		0	0	0	0	0.00909699	0	0		0
		0	0	0	0	0.00909699	0	0		0
		0	0	0	0	0.00909699	0	0		0
		0	0	0	0	0.00909699	0	0		0
		0	0	0	0	0.00909699	0	0		0
		0	0	0	0	0.00909699	0	0		0
		0	0	0	0	0.00909699	0	0		0
		0	0	0	0	0.00909699	0	0		0
				0	0	0.00909699				0
	Sum of Data pi =	0

## Sheet: Example
This spreadsheet was established using the volume of a sphere. For other shapes please exchange V(di) calculation
*All values must be expressed in nanometers (nm)
		Experimental Data		TSAA-NANoPoLC
		Presence percentage (pi)	Diameter (di; nm)	g(di)	V (di)	V atom	F(di)	hi	S(di)	A(di)	Finite sum=	S(di)=	1119.11
		90	10	0.9	523.599	0.00909699	57557.3	0.1	5713.87	314.159
		9	10.1	0.09	539.464	0.00909699	59301.4	0.4	2401.37	320.474	Initial concentration=	S0=	0.0002	M
		1	10.5	0.01	606.131	0.00909699	66629.8	-10.5	-6996.13	346.361
		0	0	0	0	0.00909699	0	0	0	0	Nanoparticle concentration=	[NP]=	1.78713e-07	M
		0	0	0	0	0.00909699	0	0	0	0
		0	0	0	0	0.00909699	0	0	0	0	Total Surface Area	[A]=	2.81518e-06	Use CNTRl+SHIFT+Enter after clicking on formula
		0	0	0	0	0.00909699	0	0	0	0
		0	0	0	0	0.00909699	0	0	0	0	Volume of Solution (L)	V=	0.002
		0	0	0	0	0.00909699	0	0	0	0
		0	0	0	0	0.00909699	0	0	0	0	Total Surface Area (Unit Conversion Included) nm^2	[Af]=	3390677351671170
		0	0	0	0	0.00909699	0	0	0	0
		0	0	0	0	0.00909699	0	0	0	0
		0	0	0	0	0.00909699	0	0	0	0
		0	0	0	0	0.00909699	0	0	0	0
		0	0	0	0	0.00909699	0	0	0	0
		0	0	0	0	0.00909699	0	0	0	0
		0	0	0	0	0.00909699	0	0	0	0
		0	0	0	0	0.00909699	0	0	0	0
		0	0	0	0	0.00909699	0	0	0	0
		0	0	0	0	0.00909699	0	0	0	0
		0	0	0	0	0.00909699	0	0	0	0
		0	0	0	0	0.00909699	0	0	0	0
		0	0	0	0	0.00909699	0	0	0	0
		0	0	0	0	0.00909699	0	0	0	0
		0	0	0	0	0.00909699	0	0	0	0
		0	0	0	0	0.00909699	0	0	0	0
		0	0	0	0	0.00909699	0	0	0	0
		0	0	0	0	0.00909699	0	0	0	0
		0	0	0	0	0.00909699	0	0	0	0
		0	0	0	0	0.00909699	0	0	0	0
		0	0	0	0	0.00909699	0	0	0	0
		0	0	0	0	0.00909699	0	0	0	0
		0	0	0	0	0.00909699	0	0	0	0
		0	0	0	0	0.00909699	0	0	0	0
		0	0	0	0	0.00909699	0	0	0	0
		0	0	0	0	0.00909699	0	0		0
		0	0	0	0	0.00909699	0	0		0
		0	0	0	0	0.00909699	0	0		0
		0	0	0	0	0.00909699	0	0		0
		0	0	0	0	0.00909699	0	0		0
		0	0	0	0	0.00909699	0	0		0
		0	0	0	0	0.00909699	0	0		0
		0	0	0	0	0.00909699	0	0		0
		0	0	0	0	0.00909699	0	0		0
		0	0	0	0	0.00909699	0	0		0
		0	0	0	0	0.00909699	0	0		0
		0	0	0	0	0.00909699	0	0		0
		0	0	0	0	0.00909699	0	0		0
		0	0	0	0	0.00909699	0	0		0
		0	0	0	0	0.00909699	0	0		0
		0	0	0	0	0.00909699	0	0		0
		0	0	0	0	0.00909699	0	0		0
		0	0	0	0	0.00909699	0	0		0
		0	0	0	0	0.00909699	0	0		0
		0	0	0	0	0.00909699	0	0		0
		0	0	0	0	0.00909699	0	0		0
		0	0	0	0	0.00909699	0	0		0
		0	0	0	0	0.00909699	0	0		0
		0	0	0	0	0.00909699	0	0		0
		0	0	0	0	0.00909699	0	0		0
		0	0	0	0	0.00909699	0	0		0
		0	0	0	0	0.00909699	0	0		0
		0	0	0	0	0.00909699	0	0		0
		0	0	0	0	0.00909699	0	0		0
		0	0	0	0	0.00909699	0	0		0
		0	0	0	0	0.00909699	0	0		0
		0	0	0	0	0.00909699	0	0		0
		0	0	0	0	0.00909699	0	0		0
		0	0	0	0	0.00909699	0	0		0
		0	0	0	0	0.00909699	0	0		0
		0	0	0	0	0.00909699	0	0		0
		0	0	0	0	0.00909699	0	0		0
		0	0	0	0	0.00909699	0	0		0
		0	0	0	0	0.00909699	0	0		0
		0	0	0	0	0.00909699	0	0		0
		0	0	0	0	0.00909699	0	0		0
		0	0	0	0	0.00909699	0	0		0
		0	0	0	0	0.00909699	0	0		0
		0	0	0	0	0.00909699	0	0		0
		0	0	0	0	0.00909699	0	0		0
		0	0	0	0	0.00909699	0	0		0
		0	0	0	0	0.00909699	0	0		0
		0	0	0	0	0.00909699	0	0		0
		0	0	0	0	0.00909699	0	0		0
		0	0	0	0	0.00909699	0	0		0
		0	0	0	0	0.00909699	0	0		0
		0	0	0	0	0.00909699	0	0		0
		0	0	0	0	0.00909699	0	0		0
		0	0	0	0	0.00909699	0	0		0
		0	0	0	0	0.00909699	0	0		0
		0	0	0	0	0.00909699	0	0		0
		0	0	0	0	0.00909699	0	0		0
		0	0	0	0	0.00909699	0	0		0
		0	0	0	0	0.00909699	0	0		0
		0	0	0	0	0.00909699	0	0		0
		0	0	0	0	0.00909699	0	0		0
		0	0	0	0	0.00909699	0	0		0
		0	0	0	0	0.00909699	0	0		0
		0	0	0	0	0.00909699	0	0		0
		0	0	0	0	0.00909699	0	0		0
		0	0	0	0	0.00909699	0	0		0
		0	0	0	0	0.00909699	0	0		0
		0	0	0	0	0.00909699	0	0		0
		0	0	0	0	0.00909699	0	0		0
		0	0	0	0	0.00909699	0	0		0
		0	0	0	0	0.00909699	0	0		0
		0	0	0	0	0.00909699	0	0		0
		0	0	0	0	0.00909699	0	0		0
		0	0	0	0	0.00909699	0	0		0
		0	0	0	0	0.00909699	0	0		0
		0	0	0	0	0.00909699	0	0		0
		0	0	0	0	0.00909699	0	0		0
		0	0	0	0	0.00909699	0	0		0
		0	0	0	0	0.00909699	0	0		0
		0	0	0	0	0.00909699	0	0		0
		0	0	0	0	0.00909699	0	0		0
		0	0	0	0	0.00909699	0	0		0
		0	0	0	0	0.00909699	0	0		0
		0	0	0	0	0.00909699	0	0		0
		0	0	0	0	0.00909699	0	0		0
		0	0	0	0	0.00909699	0	0		0
		0	0	0	0	0.00909699	0	0		0
		0	0	0	0	0.00909699	0	0		0
		0	0	0	0	0.00909699	0	0		0
		0	0	0	0	0.00909699	0	0		0
		0	0	0	0	0.00909699	0	0		0
		0	0	0	0	0.00909699	0	0		0
		0	0	0	0	0.00909699	0	0		0
		0	0	0	0	0.00909699	0	0		0
		0	0	0	0	0.00909699	0	0		0
		0	0	0	0	0.00909699	0	0		0
		0	0	0	0	0.00909699	0	0		0
		0	0	0	0	0.00909699	0	0		0
		0	0	0	0	0.00909699	0	0		0
		0	0	0	0	0.00909699	0	0		0
		0	0	0	0	0.00909699	0	0		0
		0	0	0	0	0.00909699	0	0		0
		0	0	0	0	0.00909699	0	0		0
		0	0	0	0	0.00909699	0	0		0
		0	0	0	0	0.00909699	0	0		0
		0	0	0	0	0.00909699	0	0		0
		0	0	0	0	0.00909699	0	0		0
		0	0	0	0	0.00909699	0	0		0
		0	0	0	0	0.00909699	0	0		0
		0	0	0	0	0.00909699	0	0		0
		0	0	0	0	0.00909699	0	0		0
		0	0	0	0	0.00909699	0	0		0
		0	0	0	0	0.00909699	0	0		0
		0	0	0	0	0.00909699	0	0		0
		0	0	0	0	0.00909699	0	0		0
		0	0	0	0	0.00909699	0	0		0
		0	0	0	0	0.00909699	0	0		0
		0	0	0	0	0.00909699	0	0		0
		0	0	0	0	0.00909699	0	0		0
				0	0	0.00909699				0
	Sum of Data pi =	100
